# Supplementary material for: Self-powered ion detectors based on dye-sensitized photovoltaics
Source: Royal Society of Chemistry journal article supplement (doi:10.1039/c4nr03417a), 2014-01-01
Supplement: c4nr03417a1.pdf [file c4nr03417a1.pdf]

## SUPPLEMENTAL INFORMATION

### Self-Powered Ion Detectors Based on Dye-Sensitized Photovoltaics

**AUTHORS:** *Kanika L. Agrawal and Max Shtein*<sup>\*</sup>

Materials Science and Engineering  
University of Michigan, Ann Arbor, MI 48109

---

<sup>\*</sup> *mshtein@umich.edu*

## Methods

**Device Fabrication:** 8 - 9  $\mu\text{M}$  thick transparent  $\text{TiO}_2$  films were prepared by doctor blading commercially available Ti-Nanoxide T/SP paste (Solaronix Inc.) on 2.2 mm thick fluorine doped tin oxide with a sheet resistance of 7 ohm/square. The substrates were cleaned using organic solvents and pre-treated in 40 mM aqueous  $\text{TiCl}_4$  solution at 70  $^\circ\text{C}$  for 30 minutes prior to film deposition. After coating with  $\text{TiO}_2$  paste, the substrates were fired for 30 minutes at 450  $^\circ\text{C}$  to allow a porous nanocrystalline film to form. (*see Supplementary Fig. 6*) This step was followed up with a  $\text{TiCl}_4$  post-treatment and additional sintering at 450  $^\circ\text{C}$  for 15 minutes. The prepared films were allowed to cool down to approximately 50  $^\circ\text{C}$  and immersed in a 0.5 mM solution of commercial N3 dye (Sigma Aldrich). The dye solution was prepared by dissolving N3 in an 8/2 (v/v) mixture of tetrahydrofuran and t-butanol. The films were soaked in dye solution for 24 hours after which they were removed from solution, rinsed with isopropanol and dried under a stream of compressed  $\text{N}_2$ . For device assembly, a 25  $\mu\text{M}$  Surlyn gasket (Solaronix, Inc.) was placed between the working electrode and the counter electrode following which, the device was placed on a hotplate at 100  $^\circ\text{C}$  and pressed down on for  $\sim 30$  seconds to ensure a good seal is obtained. The counter electrode was prepared by sputtering 50 nm Pt on FTO. Additionally, screen printed  $\text{TiO}_2$  films consisting of a 10  $\mu\text{M}$  transparent film of 15 - 20 nm diameter particles followed by a 3 - 4  $\mu\text{M}$  scattering layer of 400 nm diameter particles obtained from Solaronix Inc. were also tested. (*see Supplementary Fig. 7*)

**Electrolyte & Analyte Preparation:** Electrolyte solutions were introduced into the device through a 0.5 mm diameter drilled hole in the counter electrode using a Vac'n'Fill syringe (Solaronix, Inc.). The ideal electrolyte solution contained 0.6 M 1,2-dimethyl-3-propyl-

imidazolium iodide (DMPII), 0.1 M Lithium Iodide (LiI), 0.05 M Iodine ( $I_2$ ) and 0.5 M 4-tert-butylpyridine (tBP) in acetonitrile. Analyte solutions were prepared by dissolving  $AgNO_3$  concentrations ranging from 1 nM to 1 mM in acetonitrile.

**Solar Cell Characterization:** Current-Voltage (JV) characteristics were recorded using a Solartron Analytical Modulab MTS Materials Test System. The cells were illuminated with a Newport solar simulator (model# 91191- 1000) calibrated to AM1.5 ( $100\text{ mW/cm}^2$ ) using an NREL Si reference cell (Model PVM233 KG5).

**Electrochemical Impedance Spectroscopy:** EIS measurements were recorded using the Solartron Analytical Modulab MTS Materials Test System. The cells were scanned over a frequency range of 100 kHz to 0.1 Hz with 10 mV amplitude, at open-circuit conditions, under 1 sun illumination. The obtained Nyquist plots were fit using an equivalent circuit model to extract relevant parameters.

**Energy Dispersive X-ray Spectroscopy:** SEM and EDS measurements were made using a Hitachi SU8000 scanning electron microscope. The spectra and images shown in Figure 5 were obtained by applying an acceleration voltage of 10 kV and a working distance of 15.3 mm.

### Fitting electrochemical impedance spectroscopy (EIS) data:

A sample of the data obtained from EIS measurements is shown below along with the definition of each internal resistance identified. Since our data does not show a distinct semi-circle corresponding to the low-frequency resistance  $R_D$ , typically arising from electrolyte diffusion, we do not include this parameter in our model. The fits were performed using ZView software (Solartron Analytical). Here,  $R_{FTO}$  corresponds to the sheet resistance of the fluorine doped tin oxide (FTO) substrate,  $R_R$  is the resistance corresponding to recombination at the  $\text{TiO}_2/\text{dye}/\text{electrolyte}$  interface,  $R_{CT}$  is the resistance to charge transfer at the counter electrode and CPE1 and 2 are constant phase elements.

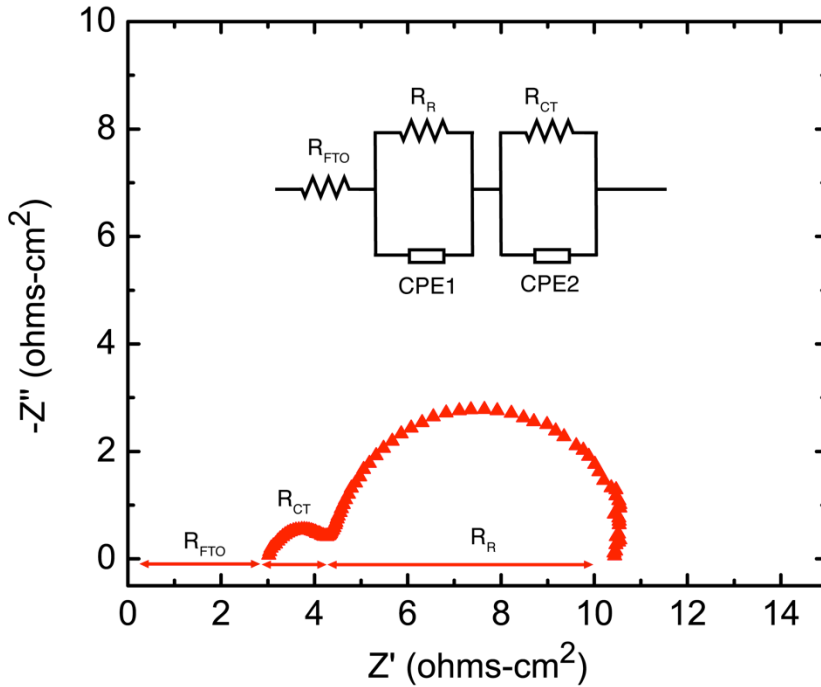

**Fig. 1.** EIS data of a typical device under AM 1.5 ( $100 \text{ mW/cm}^2$ ) simulated sunlight at open-circuit conditions. Shown here are the resistances corresponding to the high, mid and low-frequency regions on the Nyquist plot. *Inset:* Equivalent circuit model used to fit the data.

### Modeling device current density-voltage (JV) characteristics:

To model the JV characteristics of the system, we consider a modified equivalent circuit model as described by Han et al. [1]

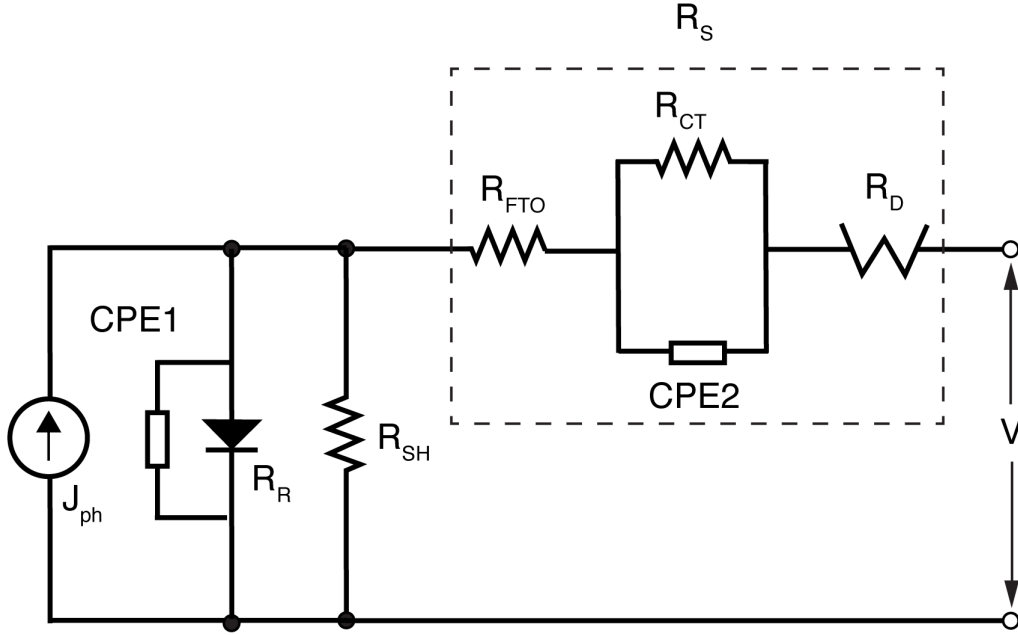

**Fig. 2.** Here,  $J_{ph}$  is the photocurrent,  $R_S$  is the series resistance,  $R_{SH}$  is the shunt resistance, and  $V$  is the bias voltage, while  $R_{FTO}$  corresponds to the sheet resistance of the FTO,  $R_R$  is the resistance corresponding to recombination at the  $TiO_2$ /dye/electrolyte interface,  $R_{CT}$  is the resistance to charge transfer at the counter electrode,  $R_D$  (Warburg element) corresponds to the electrolyte diffusion resistance and CPE1 and 2 are constant phase elements.

For JV modeling, the capacitances associated with  $R_R$  and  $R_{CT}$  may be ignored since these measurements are performed under DC conditions, while  $R_R$  may be treated as a diode. We lump the other three internal resistances into one fitting parameter ' $R_S'$ '. The JV curve can now be modeled as per the generalized Shockley equation. [2].

$$J = \frac{R_{SH}}{R_S + R_{SH}} \left\{ J_S \left[ \exp \left( \frac{q(V - JR_S)}{nkT} \right) - 1 \right] + \frac{V}{R_{SH}} \right\} - J_{ph}(V)$$

where  $J_S$  is the reverse dark saturation current and  $n$  is the ideality factor. To obtain the trends seen in Fig. 4, we set  $J_{ph} = J_{SC}$  and  $R_{SH} = 0.1 \text{ M}\Omega\text{-cm}^2$  (estimated from dark current data) with  $R_S$ ,  $J_S$ , and  $n$  as fitting parameters.

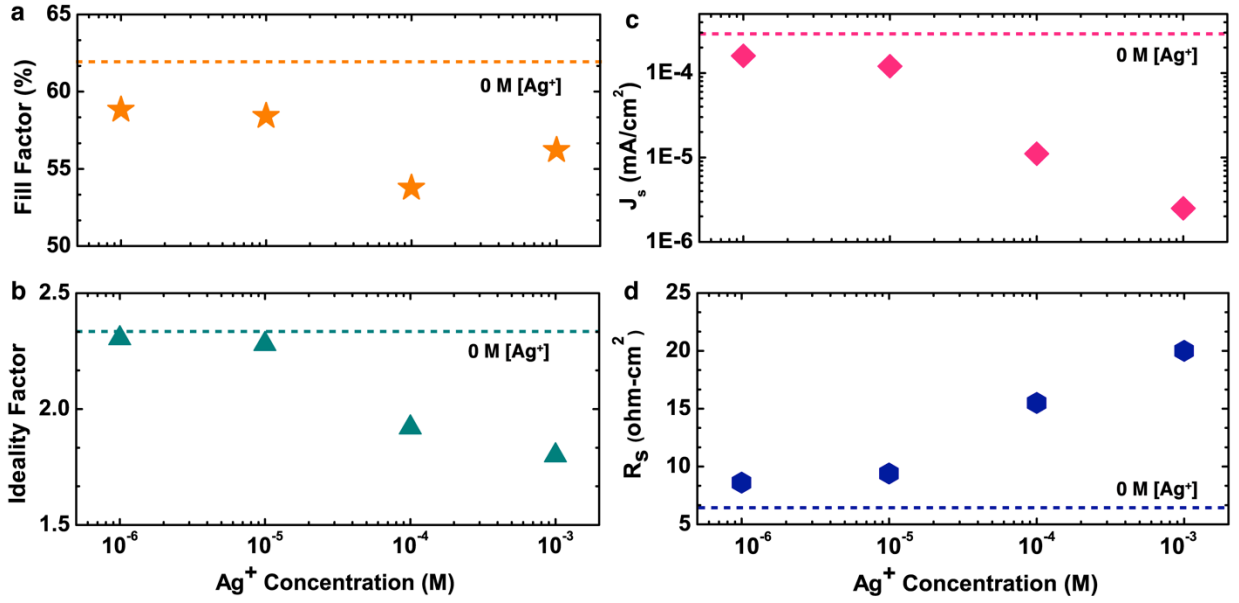

**Fig. 3.** (a) Changes in fill factor as a function of  $[\text{Ag}^+]$ . No noticeable trend is seen here (b) The ideality factor ( $n$ ) obtained from fitting our data to a Shockley model as a function of  $[\text{Ag}^+]$ . (c) Changes in the saturation current in the dark plotted as a function of  $[\text{Ag}^+]$ . (d) Changes in series resistance plotted as a function of  $[\text{Ag}^+]$ .

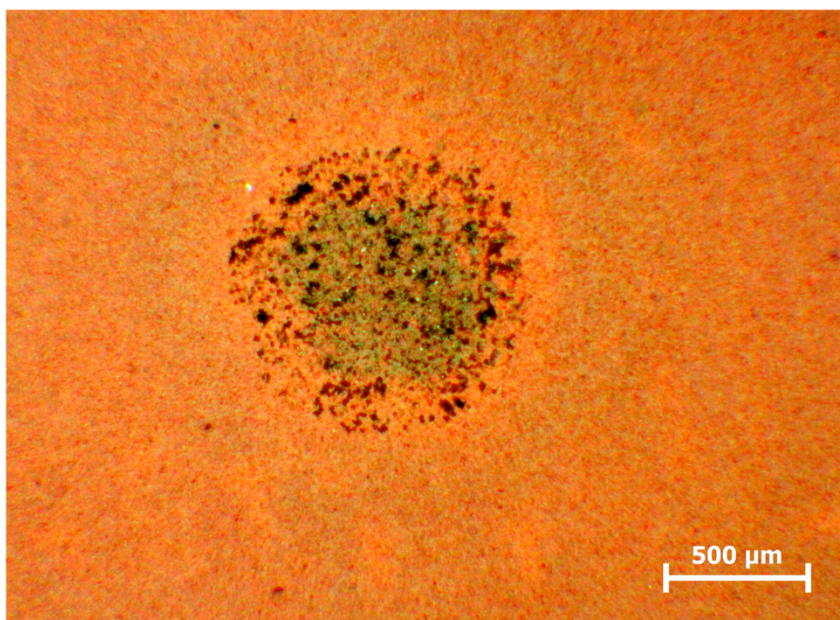

**Fig. 4.** An image showing silver clusters formed on the  $\text{TiO}_2$  film after sensor tests were performed, directly underneath the filling hole.

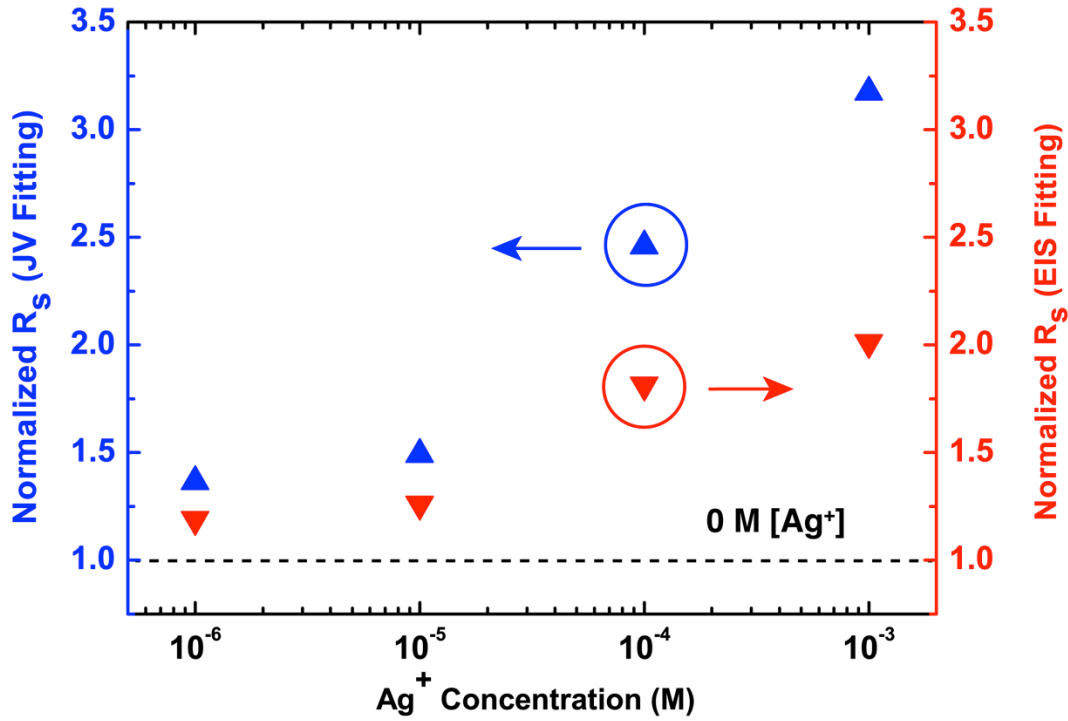

**Fig. 5.** The left hand side y-axis shows the normalized values of  $R_s$  that are obtained from fitting the JV data to a Shockley model as seen in Fig. 4(d). The right-hand side y-axis shows the normalized values of  $R_s$  that are obtained by plugging in the resistance values obtained from EIS measurements into the following equation:  $R_s = R_{FTO} + R_{CT}$ . It must be noted that  $R_D$  was not taken into account, since we could not fit this resistance, as previously mentioned. The discrepancy between the two sets of  $R_s$  values, especially at higher concentrations of  $\text{Ag}^+$  most likely arises from this omission. Consequently, it appears that  $R_D$  becomes larger at higher concentrations of  $\text{Ag}^+$ , which is consistent with the hypothesis that the mobility of triiodide ions is reduced as the  $\text{Ag}^+$  content in the electrolyte becomes larger.



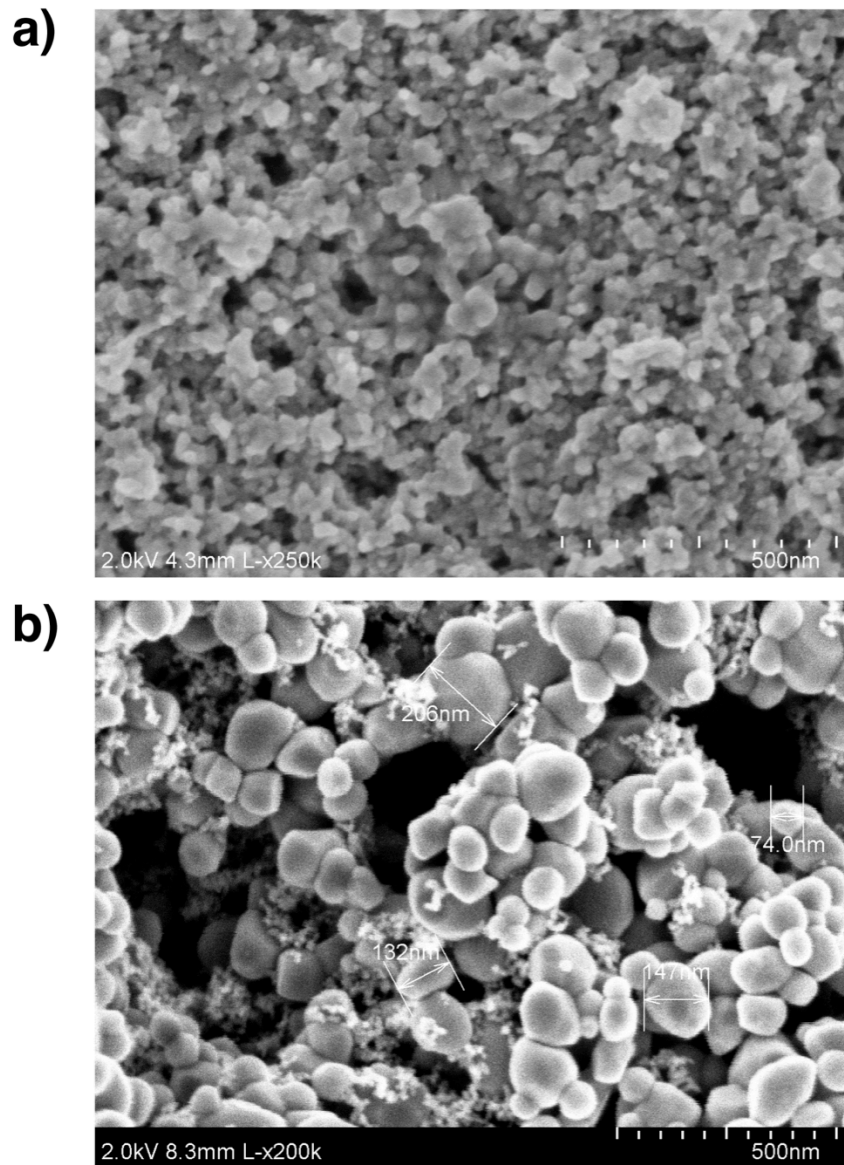

**Fig. 6.** (a) An SEM image of a TiO<sub>2</sub> electrode prepared by doctor blading 9 μm thick film of T/SP paste. (b) SEM image of a screen printed TiO<sub>2</sub> electrode consisting a 10 μm transparent film of 15 - 20 nm diameter particles followed by a 3 - 4 μm scattering layer of 400 nm diameter particles obtained from Solaronix Inc.

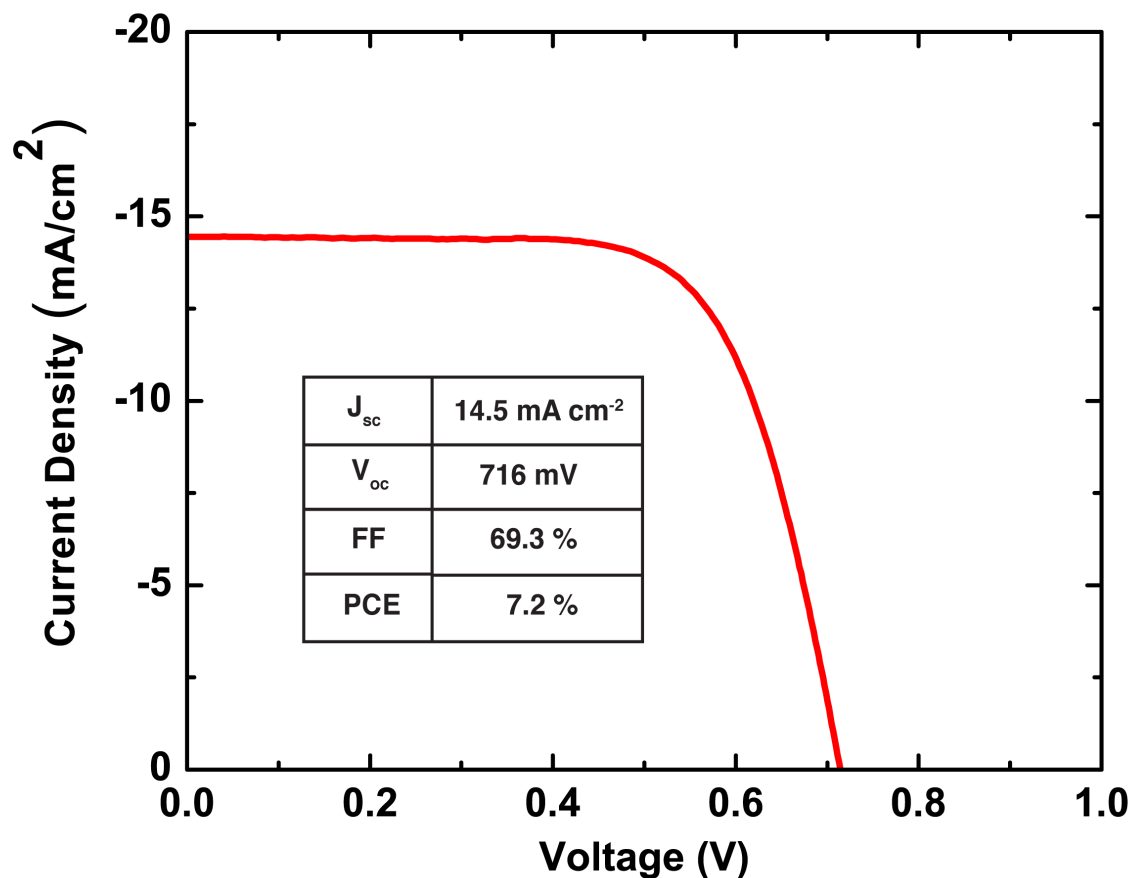

**Fig. 7.** J-V characteristics of a device with a screen-printed TiO<sub>2</sub> electrode (transparent + scattering films) under AM 1.5 (100 mW/cm<sup>2</sup>) simulated sunlight. The area of the dye coated TiO<sub>2</sub> region was 0.36 cm<sup>2</sup>. *Inset:* Obtained performance parameters for one such device. Based on literature, the scattering layer should facilitate a current enhancement by increasing light absorption within the device. However, we did not find such an improvement to occur perhaps because the screen-printed films were not freshly prepared.

## Notes and references

1. L. Han, N. Koide, Y. Chiba and T. Mitate, *App. Phys. Lett.* 2004, **84**, 2433.
2. R. H. Bube and A. L. Fahrenbruch, *Advances in Electronics and Electron Physics* (Academic, New York, 1981), p. 163.
